# Supplementary material for: Yellow Leaf Disease Resistance and Melanaphis sacchari Preference in Commercial Sugarcane Cultivars
Source: MDPI journal article supplement (doi:10.3390/plants12173079), 2023-08-28
Supplement: s1 [file s1]

**Yellow Leaf Disease resistance and *Melanaphis sacchari* preference in commercial sugarcane cultivars**

**Luiz Eduardo Tilhaqui Bertasello<sup>1</sup>, Marcel Fernando da Silva<sup>2</sup>, Luciana Rossini Pinto<sup>1,2</sup>, Paula Macedo Nóbile<sup>2</sup>, Michele Carmo-Sousa<sup>3</sup>, Ivan Antônio dos Anjos<sup>2</sup>, Dilermando Perecin<sup>1</sup>, João Roberto Spotti Lopes<sup>3</sup> and Marcos Cesar Gonçalves<sup>1,4\*</sup>**

<sup>1</sup>São Paulo State University - UNESP. School of Agricultural and Veterinary Sciences - FCAV, Jaboticabal, São Paulo, 17.884-900 Brazil; luiz.bertasello@unesp.br

<sup>2</sup>Sugarcane Research Centre, Instituto Agrônômico de Campinas - IAC, Ribeirão Preto, São Paulo, 14.001-970, Brazil; luciana.rossini@sp.gov.br; marcel.fernsilva@gmail.com

<sup>3</sup>Department of Entomology and Acarology, Escola Superior de Agricultura Luiz de Queiroz (ESALQ), University of São Paulo, Piracicaba 13418-900, Brazil

<sup>4</sup>Crop Protection Research Centre - Instituto Biológico - IB, São Paulo, 04.014-002, Brazil; marcos.goncalves@sp.gov.br

\* Correspondence: marcos.goncalves@sp.gov.br (M.C.G.); Tel.: +55-11-50871767

**Supplementary Table S1.** Variance analysis (ANOVA) for yellow leaf severity of eight sugarcane cultivars across six monthly evaluations in a field assay.

| Source    | DF  | Sum Square | Mean Square | F Value | Pr > F |
|-----------|-----|------------|-------------|---------|--------|
| Cultivar  | 7   | 2.6168     | 0.3738      | 107.196 | <0.001 |
| Block     | 5   | 0.0111     | 0.0022      | 0.636   | 0.673  |
| Time      | 5   | 0.7455     | 0.1491      | 42.755  | <0.001 |
| Residuals | 270 | 0.9416     | 0.0035      |         |        |
| CV (%)    |     |            | 4.132       |         |        |

**Supplementary Table S2.** Cycle threshold (Ct) of the reference gene candidates with respective mean Ct, standard deviation, individual and mean efficiencies (eff.), and coefficient of determination ( $R^2$ ) estimated by RT-qPCR for eight sugarcane cultivars planted in a field trial.

| Reference gene candidate | timepoint | Ct    | Individual efficiency | $R^2$ | Mean Ct $\pm$ SD | Mean eff. $\pm$ SD |
|--------------------------|-----------|-------|-----------------------|-------|------------------|--------------------|
| TPI                      | 00 MAP    | 32.13 | 1.77                  | 0.99  | 31.71 $\pm$ 0.4  | 1.85 $\pm$ 0.09    |
| TPI                      | 00 MAP    | 31.35 | 1.82                  | 0.99  |                  |                    |
| TPI                      | 00 MAP    | 31.64 | 1.70                  | 1.00  |                  |                    |
| TPI                      | 08 MAP    | NA    | -                     | -     | -                | -                  |
| TPI                      | 08 MAP    | NA    | -                     | -     |                  |                    |
| TPI                      | 08 MAP    | NA    | -                     | -     |                  |                    |
| TPI                      | 10 MAP    | NA    | -                     | -     | 30.18 $\pm$ 0.14 |                    |
| TPI                      | 10 MAP    | 30.08 | 2.01                  | 1.00  |                  |                    |
| TPI                      | 10 MAP    | 30.27 | 1.89                  | 1.00  |                  |                    |
| TPI                      | 12 MAP    | 29.47 | 1.86                  | 1.00  | 29.29 $\pm$ 0.17 |                    |
| TPI                      | 12 MAP    | 29.14 | 1.88                  | 1.00  |                  |                    |
| TPI                      | 12 MAP    | 29.26 | 1.83                  | 1.00  |                  |                    |
| UBC18                    | 00 MAP    | 30.68 | 1.91                  | 1.00  | 30.7 $\pm$ 0.1   | 1.94 $\pm$ 0.04    |
| UBC18                    | 00 MAP    | 30.61 | 1.94                  | 1.00  |                  |                    |
| UBC18                    | 00 MAP    | 30.81 | 1.94                  | 1.00  |                  |                    |
| UBC18                    | 08 MAP    | 33.23 | 1.93                  | 0.99  | 33.4 $\pm$ 0.43  |                    |
| UBC18                    | 08 MAP    | 33.89 | 1.92                  | 0.99  |                  |                    |
| UBC18                    | 08 MAP    | 33.09 | 1.91                  | 0.99  |                  |                    |
| UBC18                    | 10 MAP    | 31.13 | 1.96                  | 1.00  | 30.97 $\pm$ 0.14 |                    |
| UBC18                    | 10 MAP    | 30.9  | 1.98                  | 1.00  |                  |                    |
| UBC18                    | 10 MAP    | 30.89 | 2.00                  | 1.00  |                  |                    |
| UBC18                    | 12 MAP    | 30.16 | 1.96                  | 1.00  | 29.95 $\pm$ 0.19 |                    |
| UBC18                    | 12 MAP    | 29.84 | 1.86                  | 1.00  |                  |                    |
| UBC18                    | 12 MAP    | 29.84 | 1.94                  | 1.00  |                  |                    |
| SAND                     | 00 MAP    | 28.68 | 2.04                  | 1.00  | 28.79 $\pm$ 0.1  | 2.00 $\pm$ 0.04    |
| SAND                     | 00 MAP    | 28.87 | 1.95                  | 1.00  |                  |                    |
| SAND                     | 00 MAP    | 28.82 | 1.94                  | 1.00  |                  |                    |
| SAND                     | 08 MAP    | 30.11 | 2.02                  | 1.00  | 30.1 $\pm$ 0.04  |                    |
| SAND                     | 08 MAP    | 30.13 | 2.04                  | 1.00  |                  |                    |
| SAND                     | 08 MAP    | 30.06 | 2.03                  | 1.00  |                  |                    |
| SAND                     | 10 MAP    | 28.21 | 1.99                  | 1.00  | 28.55 $\pm$ 0.3  |                    |
| SAND                     | 10 MAP    | 28.75 | 1.96                  | 1.00  |                  |                    |
| SAND                     | 10 MAP    | 28.69 | 2.08                  | 1.00  |                  |                    |
| SAND                     | 12 MAP    | 28.22 | 1.99                  | 1.00  | 28.5 $\pm$ 0.24  |                    |
| SAND                     | 12 MAP    | 28.66 | 1.99                  | 1.00  |                  |                    |
| SAND                     | 12 MAP    | 28.62 | 1.97                  | 1.00  |                  |                    |
| UK                       | 00 MAP    | 29.33 | 1.97                  | 1.00  | 29.21 $\pm$ 0.11 | 2.02 $\pm$ 0.06    |
| UK                       | 00 MAP    | 29.14 | 2.00                  | 1.00  |                  |                    |
| UK                       | 00 MAP    | 29.15 | 2.00                  | 1.00  |                  |                    |
| UK                       | 08 MAP    | 32.78 | 1.92                  | 0.99  | 32.72 $\pm$ 0.13 |                    |
| UK                       | 08 MAP    | 32.57 | 2.01                  | 0.99  |                  |                    |
| UK                       | 08 MAP    | 32.81 | 1.99                  | 0.99  |                  |                    |
| UK                       | 10 MAP    | 30.88 | 2.01                  | 1.00  | 30.98 $\pm$ 0.11 |                    |
| UK                       | 10 MAP    | 30.94 | 2.03                  | 1.00  |                  |                    |
| UK                       | 10 MAP    | 31.1  | 2.02                  | 1.00  |                  |                    |
| UK                       | 12 MAP    | 28.1  | 2.13                  | 1.00  | 28.13 $\pm$ 0.03 |                    |
| UK                       | 12 MAP    | 28.13 | 2.10                  | 1.00  |                  |                    |
| UK                       | 12 MAP    | 28.17 | 2.11                  | 1.00  |                  |                    |
| TUB                      | 00 MAP    | 26.67 | 1.98                  | 1.00  | 26.51 $\pm$ 0.16 | 2.13 $\pm$ 0.14    |
| TUB                      | 00 MAP    | 26.52 | 2.04                  | 1.00  |                  |                    |
| TUB                      | 00 MAP    | 26.34 | 2.09                  | 1.00  |                  |                    |
| TUB                      | 08 MAP    | 29.09 | 2.11                  | 1.00  | 29.01 $\pm$ 0.09 |                    |
| TUB                      | 08 MAP    | 28.91 | 2.19                  | 1.00  |                  |                    |
| TUB                      | 08 MAP    | 29.01 | 2.55                  | 0.99  |                  |                    |
| TUB                      | 10 MAP    | 27.92 | 2.06                  | 1.00  | 27.94 $\pm$ 0.02 |                    |

|       |        |       |      |      |              |             |
|-------|--------|-------|------|------|--------------|-------------|
| TUB   | 10 MAP | 27.96 | 2.17 | 1.00 |              |             |
| TUB   | 10 MAP | 27.95 | 2.08 | 1.00 |              |             |
| TUB   | 12 MAP | 26.26 | 2.05 | 1.00 | 26.11 ± 0.13 |             |
| TUB   | 12 MAP | 26.02 | 2.10 | 1.00 |              |             |
| TUB   | 12 MAP | 26.05 | 2.08 | 1.00 |              |             |
| GAPDH | 00 MAP | 23.11 | 2.05 | 1.00 | 23.19 ± 0.1  | 1.99 ± 0.06 |
| GAPDH | 00 MAP | 23.15 | 1.96 | 1.00 |              |             |
| GAPDH | 00 MAP | 23.3  | 1.98 | 1.00 |              |             |
| GAPDH | 08 MAP | 26.45 | 1.96 | 0.99 | 26.6 ± 0.13  |             |
| GAPDH | 08 MAP | 26.65 | 2.02 | 0.99 |              |             |
| GAPDH | 08 MAP | 26.69 | 1.85 | 0.99 |              |             |
| GAPDH | 10 MAP | 23.18 | 2.02 | 1.00 | 23.21 ± 0.05 |             |
| GAPDH | 10 MAP | 23.18 | 2.08 | 1.00 |              |             |
| GAPDH | 10 MAP | 23.27 | 1.98 | 1.00 |              |             |
| GAPDH | 12 MAP | 22.54 | 1.96 | 1.00 | 22.52 ± 0.09 |             |
| GAPDH | 12 MAP | 22.42 | 2.00 | 1.00 |              |             |
| GAPDH | 12 MAP | 22.59 | 2.00 | 1.00 |              |             |

\* NA=Non amplified.



**Supplementary Table S3.** Cycle threshold (Ct) of the viral target and reference gene (UBC18) with respective mean Ct, standard deviation (SD), individual and mean efficiency, and coefficient of determination (R<sup>2</sup>) estimated by RT-qPCR for eight sugarcane cultivars planted in a field trial.

| Genotype      | timepoint | Ct SCYLV | Individual efficiency | R <sup>2</sup> | Mean Ct ± SD | Ct UBC18 | Individual efficiency | R <sup>2</sup> | Mean Ct ± SD |
|---------------|-----------|----------|-----------------------|----------------|--------------|----------|-----------------------|----------------|--------------|
| IACSP95-5094  | 00 MAP    | 30.78    | 1.88                  | 1.00           | 30.22 ± 0.6  | 31.08    | 2.01                  | 1.00           | 31.17 ± 1.1  |
| IACSP95-5094  | 00 MAP    | 30.57    | 1.94                  | 1.00           |              | 32.43    | 1.93                  | 1.00           |              |
| IACSP95-5094  | 00 MAP    | 30.51    | 1.91                  | 1.00           |              | 33.02    | 1.94                  | 1.00           |              |
| IACSP95-5094  | 08 MAP    | 29.79    | 1.87                  | 1.00           |              | 31.02    | 2.03                  | 1.00           |              |
| IACSP95-5094  | 08 MAP    | 29.41    | 1.95                  | 1.00           |              | 31.02    | 2.03                  | 1.00           |              |
| IACSP95-5094  | 08 MAP    | 29.36    | 1.86                  | 1.00           |              | 31.62    | 2.00                  | 0.99           |              |
| IACSP95-5094  | 10 MAP    | 30.20    | 1.99                  | 1.00           |              | 31.20    | 2.02                  | 1.00           |              |
| IACSP95-5094  | 10 MAP    | 30.96    | 2.11                  | 0.99           |              | 32.01    | 2.08                  | 0.99           |              |
| IACSP95-5094  | 10 MAP    | 31.26    | 1.91                  | 1.00           |              | 31.68    | 1.96                  | 1.00           |              |
| IACSP95-5094  | 12 MAP    | 29.97    | 1.90                  | 1.00           |              | 29.69    | 1.98                  | 1.00           |              |
| IACSP95-5094  | 12 MAP    | 30.00    | 1.92                  | 1.00           | 34.38 ± 4.11 | 29.57    | 1.97                  | 1.00           | 31.71 ± 3.41 |
| IACSP95-5094  | 12 MAP    | 29.80    | 1.94                  | 1.00           |              | 29.67    | 1.96                  | 1.00           |              |
| IACCTC05-2562 | 00 MAP    | 37.44    | 1.89                  | 1.00           |              | 30.25    | 2.00                  | 1.00           |              |
| IACCTC05-2562 | 00 MAP    | 38.51    | 1.91                  | 1.00           |              | 29.95    | 2.05                  | 1.00           |              |
| IACCTC05-2562 | 00 MAP    | 37.97    | 1.05                  | 0.39           |              | 32.02    | 1.97                  | 1.00           |              |
| IACCTC05-2562 | 08 MAP    | 29.86    | 1.87                  | 1.00           |              | 28.47    | 1.96                  | 1.00           |              |
| IACCTC05-2562 | 08 MAP    | 29.22    | 1.99                  | 1.00           |              | 28.64    | 1.94                  | 1.00           |              |
| IACCTC05-2562 | 08 MAP    | 30.41    | 1.96                  | 1.00           |              | 28.73    | 1.99                  | 1.00           |              |
| IACCTC05-2562 | 10 MAP    | NA       | 1.87                  | 1.00           |              | 30.66    | 2.04                  | 1.00           |              |
| IACCTC05-2562 | 10 MAP    | NA       | 1.84                  | 1.00           |              | 30.91    | 2.02                  | 1.00           |              |
| IACCTC05-2562 | 10 MAP    | 38.26    | 1.94                  | 1.00           | 36.49 ± 0.85 | 29.64    | 1.98                  | 1.00           | 32.67 ± 2.58 |
| IACCTC05-2562 | 12 MAP    | 33.36    | 1.95                  | 1.00           |              | 36.49    | 1.85                  | 1.00           |              |
| IACCTC05-2562 | 12 MAP    | NA       | 1.00                  | 0.00           |              | 36.98    | 1.96                  | 1.00           |              |
| IACCTC05-2562 | 12 MAP    | NA       | 1.00                  | 0.00           |              | 37.78    | 2.19                  | 1.00           |              |
| IACSP01-5503  | 00 MAP    | 36.35    | 1.89                  | 1.00           |              | 31.52    | 1.95                  | 1.00           |              |
| IACSP01-5503  | 00 MAP    | 35.90    | 1.84                  | 1.00           |              | 31.49    | 1.99                  | 1.00           |              |
| IACSP01-5503  | 00 MAP    | 37.20    | 1.92                  | 1.00           |              | 31.68    | 1.95                  | 1.00           |              |
| IACSP01-5503  | 08 MAP    | NA       | 1.12                  | 0.87           |              | 37.17    | 2.01                  | 1.00           |              |
| IACSP01-5503  | 08 MAP    | NA       | 1.03                  | 0.94           |              | 37.10    | 1.88                  | 1.00           |              |
| IACSP01-5503  | 08 MAP    | NA       | 1.00                  | 0.00           |              | 36.44    | 1.99                  | 1.00           |              |
| IACSP01-5503  | 10 MAP    | 35.32    | 1.88                  | 1.00           |              | 31.42    | 2.00                  | 0.99           |              |
| IACSP01-5503  | 10 MAP    | 36.57    | 1.90                  | 1.00           |              | 31.49    | 2.05                  | 1.00           |              |

|              |        |       |      |      |              |       |      |      |              |
|--------------|--------|-------|------|------|--------------|-------|------|------|--------------|
| IACSP01-5503 | 10 MAP | 36.22 | 1.90 | 1.00 |              | 31.59 | 2.13 | 0.98 |              |
| IACSP01-5503 | 12 MAP | 37.90 | 1.83 | 1.00 |              | 30.74 | 2.04 | 1.00 |              |
| IACSP01-5503 | 12 MAP | NA    | 1.77 | 1.00 |              | 30.73 | 1.91 | 1.00 |              |
| IACSP01-5503 | 12 MAP | NA    | 1.00 | 0.00 |              | 30.66 | 1.99 | 1.00 |              |
| IACSP96-7569 | 00 MAP | 34.93 | 1.89 | 1.00 | 32.33 ± 2.49 | 31.46 | 1.92 | 1.00 | 32.43 ± 1.01 |
| IACSP96-7569 | 00 MAP | 36.55 | 1.90 | 1.00 |              | 31.50 | 1.92 | 1.00 |              |
| IACSP96-7569 | 00 MAP | 35.86 | 1.92 | 1.00 |              | 31.00 | 1.94 | 1.00 |              |
| IACSP96-7569 | 08 MAP | 32.88 | 1.83 | 1.00 |              | 33.64 | 2.00 | 1.00 |              |
| IACSP96-7569 | 08 MAP | 32.88 | 1.88 | 1.00 |              | 33.91 | 1.98 | 1.00 |              |
| IACSP96-7569 | 08 MAP | 33.10 | 1.85 | 1.00 |              | 34.05 | 1.96 | 1.00 |              |
| IACSP96-7569 | 10 MAP | 30.79 | 1.90 | 1.00 |              | 32.47 | 1.95 | 1.00 |              |
| IACSP96-7569 | 10 MAP | 31.18 | 1.87 | 1.00 |              | 32.56 | 1.97 | 1.00 |              |
| IACSP96-7569 | 10 MAP | 31.49 | 1.89 | 1.00 |              | 32.79 | 1.97 | 1.00 |              |
| IACSP96-7569 | 12 MAP | 29.17 | 1.84 | 1.00 |              | 32.12 | 1.97 | 1.00 |              |
| IACSP96-7569 | 12 MAP | 29.55 | 1.89 | 1.00 |              | 31.80 | 1.97 | 1.00 |              |
| IACSP96-7569 | 12 MAP | 29.53 | 1.90 | 1.00 |              | 31.80 | 1.99 | 1.00 |              |
| IACBIO-266   | 00 MAP | 26.41 | 1.87 | 1.00 | 34.24 ± 6.16 | 30.22 | 2.00 | 1.00 | 30.65 ± 0.75 |
| IACBIO-266   | 00 MAP | 26.79 | 1.90 | 1.00 |              | 30.02 | 1.98 | 1.00 |              |
| IACBIO-266   | 00 MAP | 27.02 | 1.88 | 1.00 |              | 30.01 | 1.96 | 1.00 |              |
| IACBIO-266   | 08 MAP | 40.00 | 1.89 | 1.00 |              | 30.94 | 1.95 | 1.00 |              |
| IACBIO-266   | 08 MAP | 40.00 | 1.86 | 1.00 |              | 30.95 | 2.30 | 1.00 |              |
| IACBIO-266   | 08 MAP | 40.00 | 1.90 | 1.00 |              | 31.01 | 1.95 | 1.00 |              |
| IACBIO-266   | 10 MAP | 29.97 | 1.86 | 1.00 |              | 31.74 | 1.93 | 1.00 |              |
| IACBIO-266   | 10 MAP | 30.30 | 1.87 | 1.00 |              | 31.83 | 1.94 | 1.00 |              |
| IACBIO-266   | 10 MAP | 30.33 | 1.87 | 1.00 |              | 31.35 | 1.95 | 1.00 |              |
| IACBIO-266   | 12 MAP | 40.00 | 1.92 | 1.00 |              | 29.78 | 1.95 | 1.00 |              |
| IACBIO-266   | 12 MAP | 40.00 | 1.84 | 1.00 |              | 29.73 | 1.96 | 1.00 |              |
| IACBIO-266   | 12 MAP | 40.00 | 1.92 | 1.00 |              | 30.16 | 1.93 | 1.00 |              |
| IACSP01-3127 | 00 MAP | 26.16 | 1.89 | 1.00 | 28.47 ± 1.75 | 31.29 | 1.93 | 1.00 | 31.1 ± 0.51  |
| IACSP01-3127 | 00 MAP | 26.52 | 1.92 | 1.00 |              | 31.06 | 1.94 | 1.00 |              |
| IACSP01-3127 | 00 MAP | 26.54 | 1.90 | 1.00 |              | 30.99 | 1.93 | 1.00 |              |
| IACSP01-3127 | 08 MAP | NA    | 1.04 | 0.85 |              | NA    | 1.00 | 0.00 |              |
| IACSP01-3127 | 08 MAP | NA    | 1.01 | 0.81 |              | NA    | 1.05 | 0.71 |              |
| IACSP01-3127 | 08 MAP | NA    | 1.01 | 0.80 |              | NA    | 1.05 | 0.06 |              |
| IACSP01-3127 | 10 MAP | 28.43 | 1.75 | 1.00 |              | 31.67 | 1.99 | 1.00 |              |
| IACSP01-3127 | 10 MAP | 28.56 | 1.92 | 1.00 |              | 31.55 | 1.97 | 1.00 |              |
| IACSP01-3127 | 10 MAP | 28.75 | 1.93 | 1.00 |              | 31.71 | 1.96 | 1.00 |              |
| IACSP01-3127 | 12 MAP | 30.22 | 1.89 | 1.00 |              | 30.24 | 2.03 | 1.00 |              |
| IACSP01-3127 | 12 MAP | 30.50 | 1.90 | 1.00 |              | 30.88 | 1.95 | 1.00 |              |
| IACSP01-3127 | 12 MAP | 30.53 | 1.91 | 1.00 |              | 30.54 | 1.90 | 1.00 |              |
| IACSP95-5000 | 00 MAP | 36.75 | 1.84 | 0.99 | 30.84 ± 3.69 | 35.77 | 1.80 | 1.00 | 33.08 ± 1.49 |
| IACSP95-5000 | 00 MAP | 37.59 | 1.73 | 0.99 |              | 35.32 | 1.83 | 0.99 |              |

|                       |        |       |                    |      |              |                    |      |      |             |
|-----------------------|--------|-------|--------------------|------|--------------|--------------------|------|------|-------------|
| IACSP95-5000          | 00 MAP | 35.82 | 1.81               | 1.00 |              | 34.93              | 1.86 | 0.99 |             |
| IACSP95-5000          | 08 MAP | 28.41 | 1.99               | 1.00 |              | 32.37              | 2.01 | 1.00 |             |
| IACSP95-5000          | 08 MAP | 28.56 | 2.06               | 1.00 |              | 33.23              | 1.91 | 1.00 |             |
| IACSP95-5000          | 08 MAP | 27.85 | 1.91               | 1.00 |              | 33.36              | 1.96 | 1.00 |             |
| IACSP95-5000          | 10 MAP | 30.66 | 1.91               | 1.00 |              | 32.19              | 1.93 | 1.00 |             |
| IACSP95-5000          | 10 MAP | 27.52 | 2.05               | 1.00 |              | 32.75              | 1.93 | 1.00 |             |
| IACSP95-5000          | 10 MAP | 30.70 | 1.95               | 1.00 |              | 32.38              | 1.93 | 1.00 |             |
| IACSP95-5000          | 12 MAP | 28.88 | 1.92               | 1.00 |              | 31.62              | 1.88 | 1.00 |             |
| IACSP95-5000          | 12 MAP | 28.53 | 1.99               | 1.00 |              | 31.53              | 1.97 | 1.00 |             |
| IACSP95-5000          | 12 MAP | 28.82 | 1.92               | 1.00 |              | 31.54              | 1.91 | 1.00 |             |
| SP71-6163             | 00 MAP | 26.66 | 1.93               | 1.00 | 27.23 ± 1.35 | 31.70              | 1.90 | 1.00 | 31.1 ± 0.92 |
| SP71-6163             | 00 MAP | 25.81 | 1.87               | 1.00 |              | 31.77              | 1.91 | 1.00 |             |
| SP71-6163             | 00 MAP | 24.94 | 1.93               | 1.00 |              | 31.17              | 1.89 | 1.00 |             |
| SP71-6163             | 08 MAP | 27.29 | 2.02               | 1.00 |              | 30.00              | 1.91 | 1.00 |             |
| SP71-6163             | 08 MAP | 25.81 | 1.91               | 1.00 |              | 29.87              | 1.93 | 1.00 |             |
| SP71-6163             | 08 MAP | 26.28 | 2.02               | 0.99 |              | 30.24              | 1.88 | 1.00 |             |
| SP71-6163             | 10 MAP | 27.41 | 2.00               | 1.00 |              | 32.50              | 1.94 | 1.00 |             |
| SP71-6163             | 10 MAP | 28.31 | 1.98               | 1.00 |              | 31.62              | 1.94 | 1.00 |             |
| SP71-6163             | 10 MAP | 27.75 | 2.00               | 1.00 |              | 32.44              | 1.92 | 1.00 |             |
| SP71-6163             | 12 MAP | 28.24 | 1.99               | 1.00 |              | 31.04              | 1.89 | 1.00 |             |
| SP71-6163             | 12 MAP | 29.01 | 1.97               | 1.00 |              | 30.54              | 1.91 | 1.00 |             |
| SP71-6163             | 12 MAP | 29.20 | 2.01               | 1.00 |              | 30.27              | 1.89 | 1.00 |             |
| <b>Mean eff. ± SD</b> |        |       | <b>1.90 ± 0.11</b> |      |              | <b>1.96 ± 0.07</b> |      |      |             |

\* NA=Non amplified.

**Supplementary Table S4.** Melting temperature and detection of 181 bp RT-qPCR products of the SCYLV capsid protein for eight sugarcane cultivars in each sampling time point, namely 0, 8, 10, and 12 months after planting (MAP).

| Genotype      | Sampling timepoint | Technical replicate |      |      | Pos/Neg |
|---------------|--------------------|---------------------|------|------|---------|
|               |                    | 1                   | 2    | 3    |         |
| IACSP95-5094  | 0 MAP              | 82.0                | 82.0 | 82.5 | +       |
| IACSP95-5094  | 8 MAP              | 82.5                | 82.5 | 82.5 | +       |
| IACSP95-5094  | 10 MAP             | 82.5                | 82.5 | 82.5 | +       |
| IACSP95-5094  | 12 MAP             | 82.5                | 82.5 | 82.5 | +       |
| IACCTC05-2562 | 0 MAP              | 83.0                | 83.0 | 74.5 | +       |
| IACCTC05-2562 | 8 MAP              | 83.0                | 82.5 | 82.5 | +       |
| IACCTC05-2562 | 10 MAP             | 83.0                | 83.5 | 83.0 | +       |
| IACCTC05-2562 | 12 MAP             | 83.0                | 84.0 | 85.5 | +       |
| IACSP01-5503  | 0 MAP              | 82.5                | 82.5 | 82.5 | +       |
| IACSP01-5503  | 8 MAP              | 63.5                | 63.5 | 63.5 | –       |
| IACSP01-5503  | 10 MAP             | 82.5                | 82.5 | 82.5 | +       |
| IACSP01-5503  | 12 MAP             | 83.0                | 83.0 | 66.0 | +       |
| IACSP96-7569  | 0 MAP              | 82.0                | 82.0 | 82.5 | +       |
| IACSP96-7569  | 8 MAP              | 82.5                | 82.5 | 82.5 | +       |
| IACSP96-7569  | 10 MAP             | 82.5                | 82.5 | 82.5 | +       |
| IACSP96-7569  | 12 MAP             | 82.5                | 82.5 | 82.5 | +       |
| IACBIO-266    | 0 MAP              | 82.5                | 82.5 | 82.5 | +       |
| IACBIO-266    | 8 MAP              | 83.0                | 83.0 | 83.0 | +       |
| IACBIO-266    | 10 MAP             | 82.5                | 82.5 | 82.5 | +       |
| IACBIO-266    | 12 MAP             | 83.5                | 83.0 | 83.5 | +       |
| IACSP01-3127  | 0 MAP              | 82.5                | 82.5 | 82.5 | +       |
| IACSP01-3127  | 8 MAP              | 63.5                | 63.5 | 63.5 | –       |
| IACSP01-3127  | 10 MAP             | 81.5                | 82.5 | 82.5 | +       |
| IACSP01-3127  | 12 MAP             | 82.5                | 82.0 | 82.5 | +       |
| IACSP95-5000  | 0 MAP              | 83.0                | 82.5 | 82.5 | +       |
| IACSP95-5000  | 8 MAP              | 82.5                | 82.5 | 82.5 | +       |
| IACSP95-5000  | 10 MAP             | 82.5                | 82.5 | 82.5 | +       |
| IACSP95-5000  | 12 MAP             | 82.5                | 82.5 | 82.5 | +       |
| SP71-6163     | 0 MAP              | 83.0                | 82.5 | 82.5 | +       |
| SP71-6163     | 8 MAP              | 83.0                | 82.5 | 82.5 | +       |
| SP71-6163     | 10 MAP             | 82.5                | 82.5 | 82.5 | +       |
| SP71-6163     | 12 MAP             | 82.5                | 82.5 | 82.5 | +       |

RT-qPCR melting temperature of 82.5± 1.0 °C are positive to the 181 bp fragment of the SCYLV capsid protein in the genotypes. (+) SCYLV positive samples and (–) negative samples.

**Supplementary Table S5.** Analyses of candidate reference genes by the NormFinder algorithm.

| Gene name                                        | Stability value | Best Gene | Best combination of two genes |
|--------------------------------------------------|-----------------|-----------|-------------------------------|
| Triosephosphate isomerase (TPI)                  | 0.379           | 0.224     |                               |
| Ubiquitin-conjugating enzyme 18 gene (UBC18)     | 0.224           |           |                               |
| SAND protein family (SAND)                       | 0.573           |           |                               |
| Uridylate kinase (UK)                            | 0.458           |           | 0.168                         |
| TUBULIN (TUB)                                    | 0.284           |           | 0.168                         |
| Glyceraldehyde-3-phosphate dehydrogenase (GAPDH) | 0.354           |           |                               |

**Supplementary Table S6.** One-way variance analysis (ANOVA) for the number apterous adult non-viruliferous *Melanaphis sacchari* for the timepoints of 0.5, 1, 3, 6, and 24 h after release, in a free-choice bioassay with eight sugarcane cultivars.

| 0.5 h    |     |                |             |         |        |
|----------|-----|----------------|-------------|---------|--------|
| Source   | DF  | Sum of Squares | Mean Square | F Value | Pr > F |
| Cultivar | 7   | 0.55452426     | 0.07921775  | 0.92    | 0.4926 |
| Error    | 120 | 10.31706417    | 0.08597553  |         |        |
| CV (%)   |     |                | 15.78578    |         |        |
| 1 h      |     |                |             |         |        |
| Source   | DF  | Sum of Squares | Mean Square | F Value | Pr > F |
| Cultivar | 7   | 0.59436927     | 0.08490990  | 0.76    | 0.6243 |
| Error    | 120 | 13.45939532    | 0.11216163  |         |        |
| CV (%)   |     |                | 17.47641    |         |        |
| 3 h      |     |                |             |         |        |
| Source   | DF  | Sum of Squares | Mean Square | F value | Pr > F |
| Cultivar | 7   | 0.53137914     | 0.07591131  | 0.53    | 0.8089 |
| Error    | 120 | 17.12701808    | 0.14272515  |         |        |
| CV (%)   |     |                | 19.35157    |         |        |
| 6 h      |     |                |             |         |        |
| Source   | DF  | Sum of Squares | Mean Square | F value | Pr > F |
| Cultivar | 7   | 0.35090945     | 0.05012992  | 0.38    | 0.9121 |
| Error    | 120 | 15.80052990    | 0.13167108  |         |        |
| CV (%)   |     |                | 18.88871    |         |        |
| 24 h     |     |                |             |         |        |
| Source   | DF  | Sum of Squares | Mean Square | F value | Pr > F |
| Cultivar | 7   | 0.79978061     | 0.11425437  | 0.73    | 0.6502 |
| Error    | 120 | 18.88645032    | 0.15738709  |         |        |
| CV (%)   |     |                | 20.26387    |         |        |

**Supplementary table S7.** Primer pairs sequences and amplicon size (A) and melting temperatures (T<sub>m</sub>), estimated by RT-qPCR, of six genes selected for stability assessment across four sampling timepoints of sugarcane under sugarcane yellow leaf virus (SCYLV) infection, namely, triosephosphate isomerase (TPI), Uridylate kinase (UK), SAND protein family (SAND), Ubiquitin-conjugating enzyme 18 gene (UBC18), glyceraldehyde-3-phosphate dehydrogenase (GAPDH), and TUBULIN (TUB).

| Primers            | Sequence F (5'-3')           | Sequence R (5'-3')        | A (bp) | T <sub>m</sub> (°C) |
|--------------------|------------------------------|---------------------------|--------|---------------------|
| TPI <sup>a</sup>   | CAATGACTGGAGCAACGTAG         | GTAACAGAGCCTCCGTAGAT      | 200    | 84.5                |
| UK <sup>b</sup>    | GCAATCTAAGGGACATAATAAAGGTG   | AATCGAATTGCCTACTGATATGTTG | 140    | 78.5                |
| SAND <sup>b</sup>  | CTGTGTGTAAGTTGATATGTCTATGTTG | CAACAACGATGGTACTGCCT      | 94     | 77.5                |
| UBC18 <sup>b</sup> | GCCTGTCAGCCTTCCTTAC          | GGTAAGCTTCGCAAATCCAATAG   | 100    | 79.5                |
| GAPDH <sup>c</sup> | TTGGTTTCCACTGACTTCGTT        | CTGTAGCCCCACTCGTTGT       | 122    | 84.5                |
| TUB <sup>c</sup>   | CTCCACATTCATCGGCAACTC        | TCCTCCTCTTCTTCCTCCTCG     | 237    | 87.0                |

a: Primer pairs sequences reported by Zhu et al. (2010); b: Primer pairs sequences reported Silva et al. (2019); c: Primer pairs sequences reported by Andrade et al. (2017).

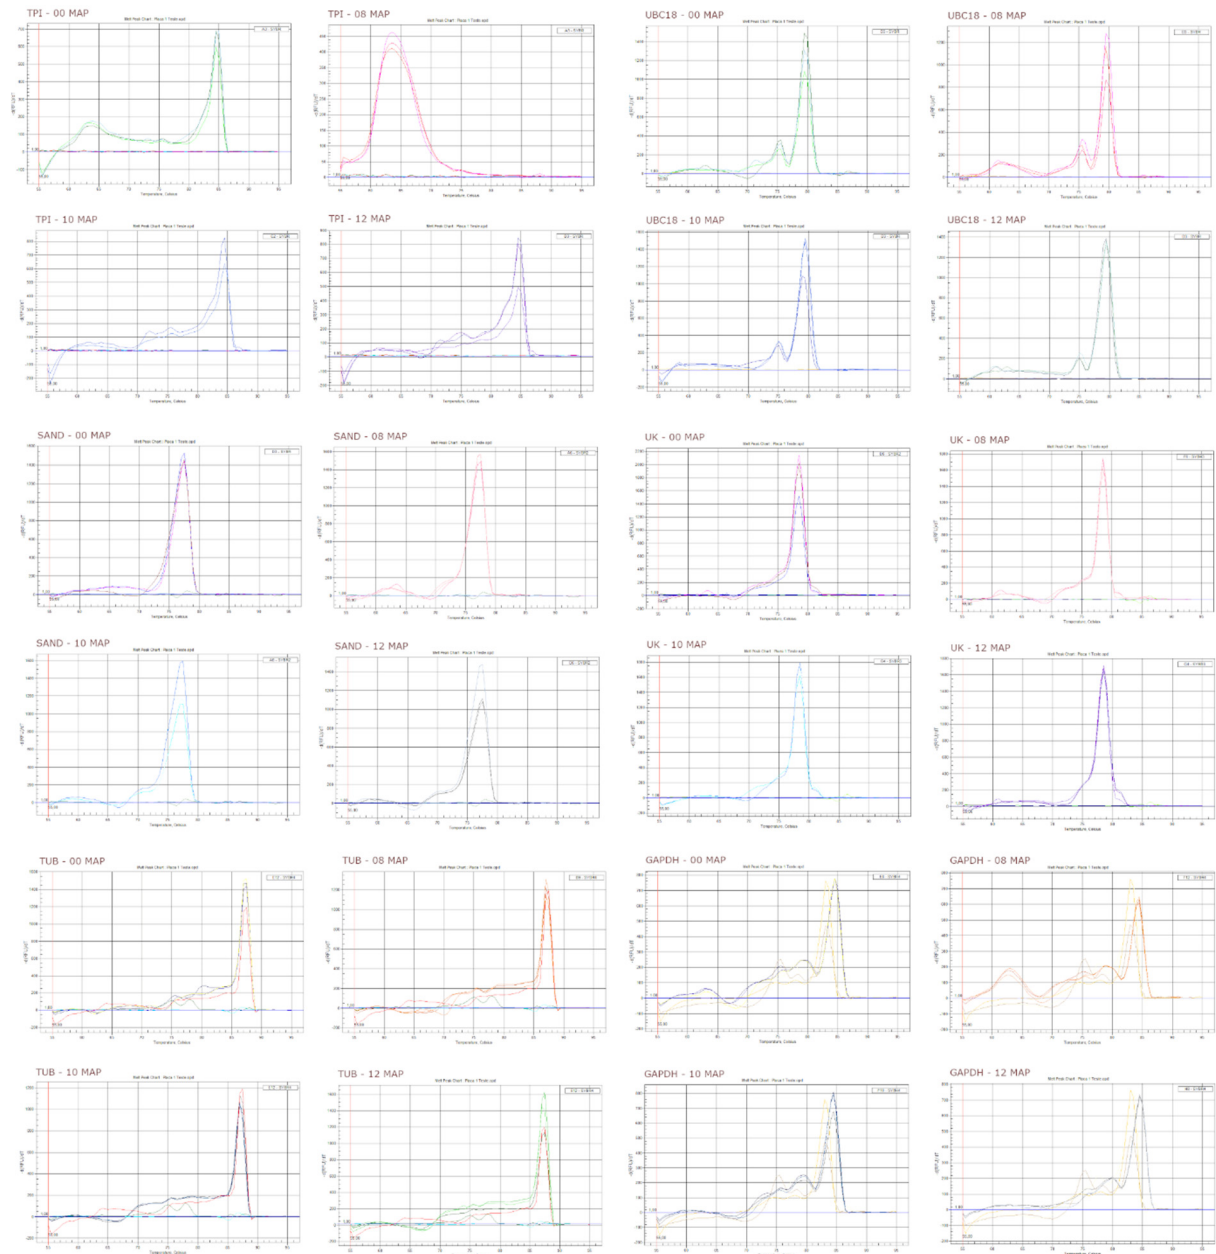

**Supplementary figure S1.** Dissociation curve of six genes selected for stability assessment across four cDNA pools, each representing the sampling times of 0, 8, 10, and 12 months after planting (MAP) and comprising eight sugarcane cultivars under sugarcane yellow leaf virus (SCYLV) infection. The candidate reference genes were triosephosphate isomerase (TPI), Uridylate kinase (UK), SAND protein family (SAND), Ubiquitin-conjugating enzyme 18 gene (UBC18), glyceraldehyde-3-phosphate.

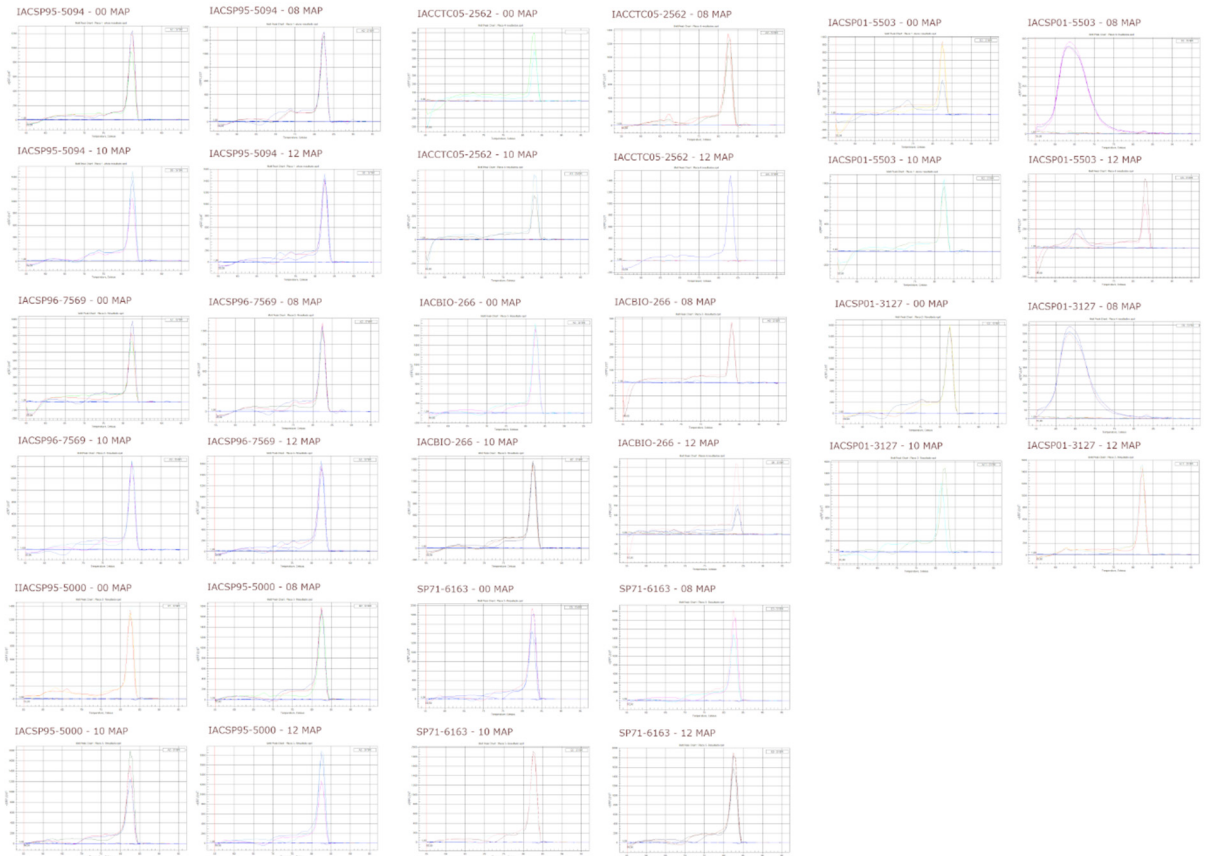

**Supplementary figure S2.** Dissociation curve of the target gene, i.e., 181 bp fragment of ScYLV capsid protein, across cDNA pools from eight sugarcane cultivars under sugarcane yellow leaf virus (SCYLV) infection and four sampling timepoints, namely 0, 8, 10, and 12 months after planting (MAP).

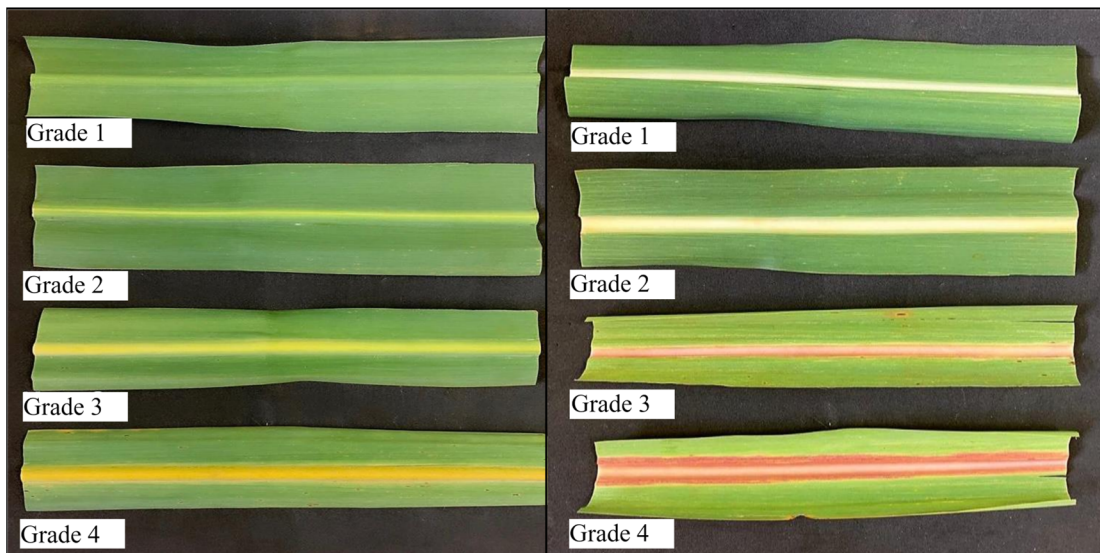

**Supplementary figure S3.** Diagrammatic scale for SCYLV symptoms intensity. Grade 1: green leaf without symptoms; Grade 2: slight yellowing of the midrib and leaf blade; Grade 3: intense yellowing of the midrib and partial yellowing of the leaf blade; Grade 4: intense yellowing of the midrib and leaf blade.



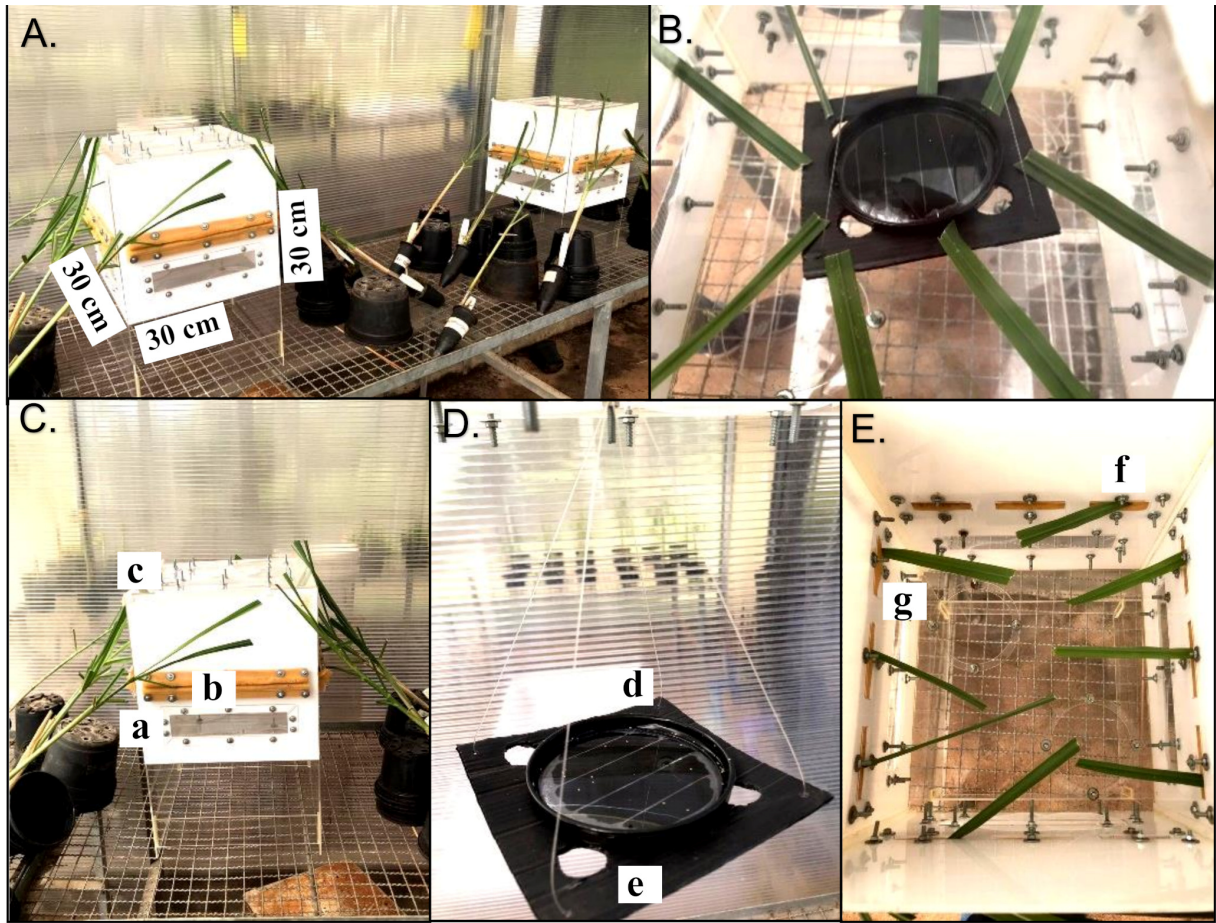

**Supplementary figure S4.** Free-choice bioassay aiming to evaluate the settling behavior of *Melanaphis sacchari* among eight sugarcane cultivars. (A) Acrylic cages (30 cm × 30 cm × 30 cm), each comprising individual leaves of plantlets from eight sugarcane cultivars. Plantlets were maintained in stiff plastic tubes and randomly distributed. (B) Individual leaves of eight sugarcane cultivars placed in a squared black platform within an acrylic cage. The squared black platform supported the circular acrylic arena where fifty apterous adult non-viruliferous were released. (C) Side view of an acrylic cage with side openings (4 × 20 cm) sealed with “voile” fabric for ventilation (a) and openings through which individual leaves were inserted (b). On top of the acrylic cage (c) there are openings (4 × 20 cm) also sealed with “voile” fabric; for a top view of a closed acrylic cage, see Ramos et al. [64]. (D) Circular arena (d) supported by a squared black platform (e), which was fixed on the roof of the acrylic cage. (E) Internal side view showing individual leaves inserted through side openings, e.g., (f) and (g).
